# Supplementary material
Source: PubMed Central journal article supplement (PMC9420700)

**Cell Reports, Volume 40**

**Supplemental information**

**Spike protein-independent attenuation  
of SARS-CoV-2 Omicron variant  
in laboratory mice**

**Shufeng Liu, Prabhuanand Selvaraj, Kotou Sangare, Binqun Luan, and Tony T. Wang**

## Supplemental Information

### **Spike Protein-independent Attenuation of SARS-CoV-2 Omicron Variant in Laboratory Mice**

Shufeng Liu<sup>1, ¶</sup>, Prabhuanand Selvaraj<sup>1, ¶</sup>, Kotou Sangare<sup>1</sup>, Binqun Luan<sup>2, \*</sup>, Tony T. Wang<sup>1, \*</sup>

<sup>1</sup>Division of Viral Products, Center for Biologics Evaluation and Research, Food and Drug Administration; Silver Spring, Maryland, USA, 20993.

<sup>2</sup> Computational Biological Center, IBM Thomas J. Watson Research, Yorktown Heights, New York 10598, United States.

\*Corresponding authors. Email: [bluan@us.ibm.com](mailto:bluan@us.ibm.com) or [Tony.Wang@fda.hhs.gov](mailto:Tony.Wang@fda.hhs.gov).

¶These authors contributed equally.

## Supplemental Figure Legends

**Figure S1. A recombinant SARS-CoV-2 (i.e., WA1-Q493R/N501Y) infects laboratory mice, Related to Figure 2.** (A) Overall study design (B) Weight loss profile. (C) sgRNA levels in nasal turbinates (NB) and the lungs at 2 DPI. Representative HE and RNAscope images of an entire lobe of the lung from the uninfected (D), WA1 infected (E), and WA1-Q493R/N501Y-infected mice (F). Closeup images are also included in (F).

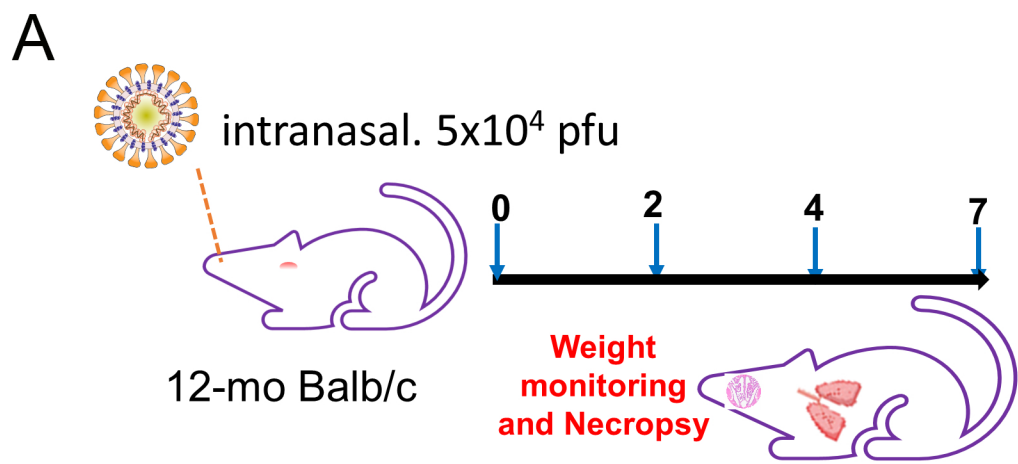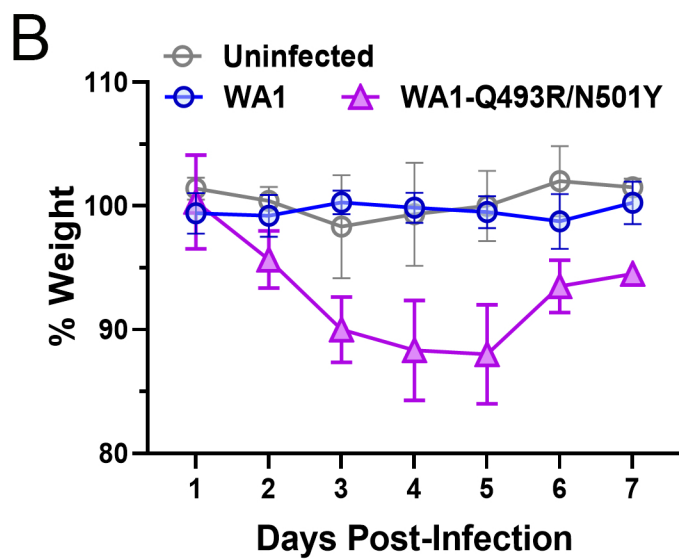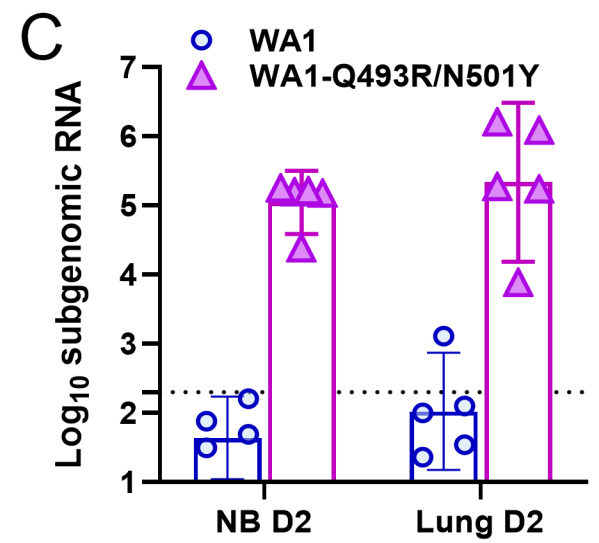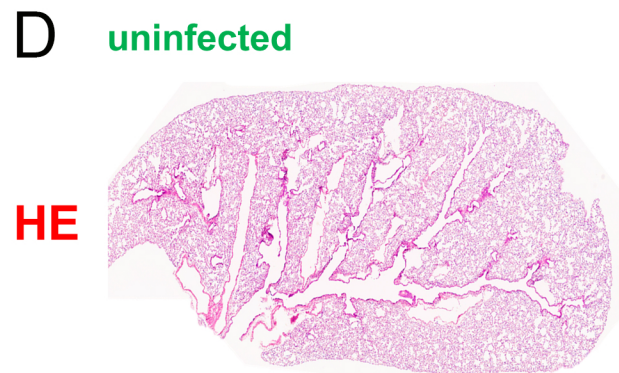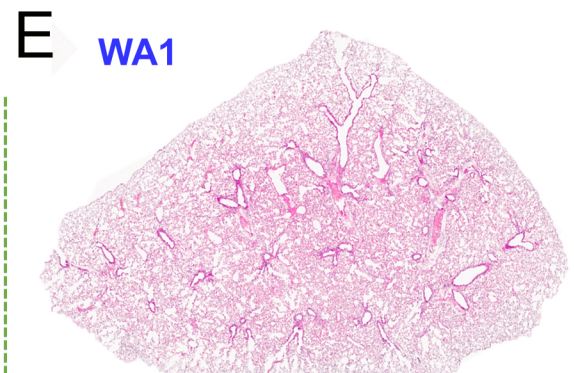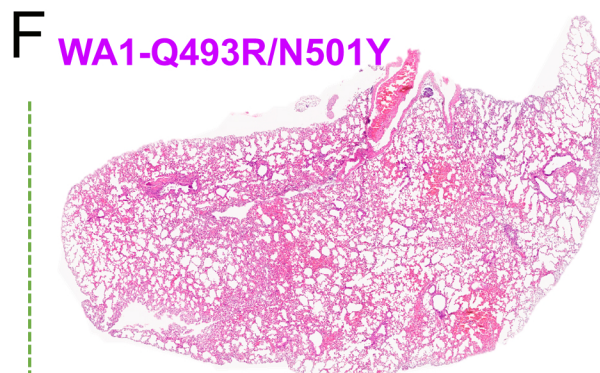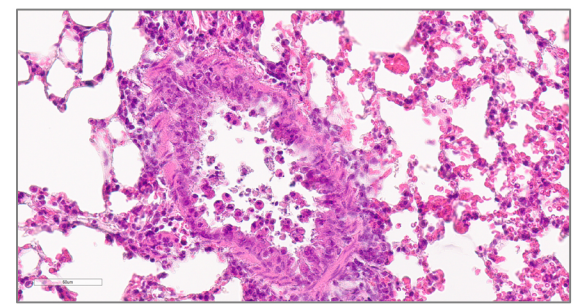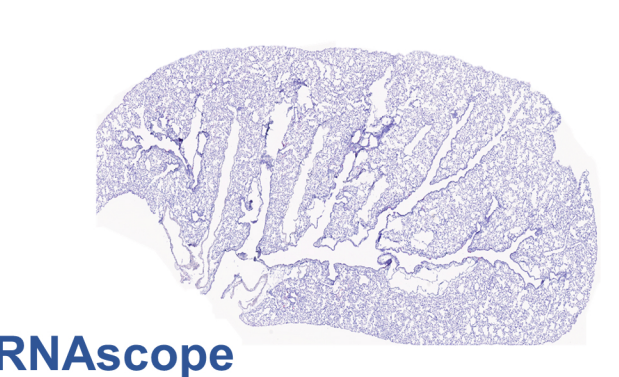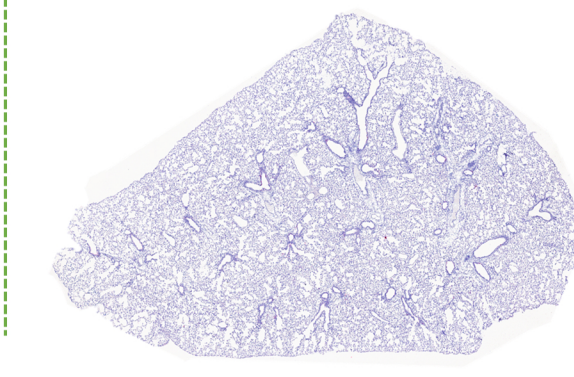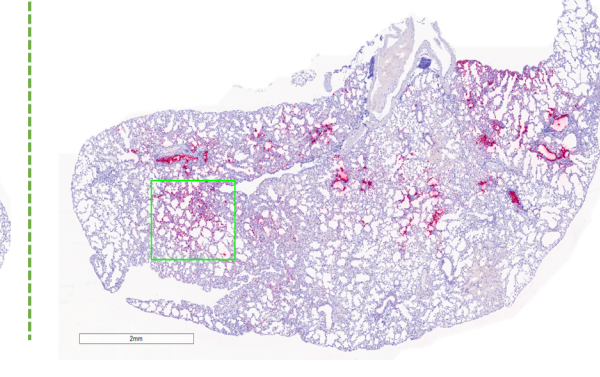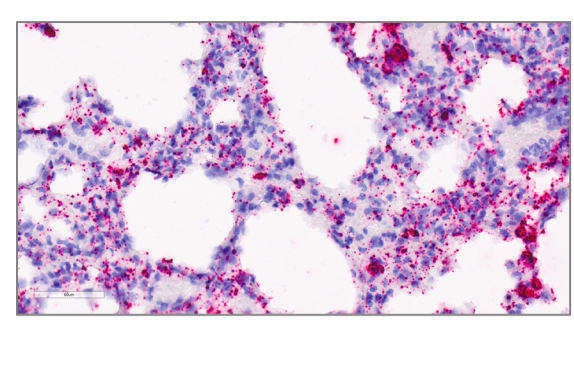

Supplement: mmc1.pdf [file mmc1.pdf]
